# Supplementary material for: Insights into Enhanced Peroxydisulfate Activation with B and Fe Co-Doped Biochar from Bark for the Rapid Degradation of Guaiacol
Source: MDPI journal article supplement (doi:10.3390/molecules28227591), 2023-11-14
Supplement: s1 [file s1]

# Insights into Enhanced Peroxydisulfate Activation with B and Fe Co-Doped Biochar from Bark for the Rapid Degradation of Guaiacol

Jian Huang <sup>1</sup>, Yu Zhu <sup>1</sup>, Huiyang Bian <sup>2</sup>, Liang Song <sup>1</sup>, Yifan Liu <sup>1</sup>, Yuancai Lv <sup>1</sup>, Xiaoxia Ye <sup>1</sup>, Chunxiang Lin <sup>1,\*</sup> and Xiaojuan Li <sup>1,\*</sup>

<sup>1</sup> College of Environment & Safety Engineering, Fuzhou University, Fuzhou 350108, China; hj@fzu.edu.cn (J.H.);

zy12500947@outlook.com (Y.Z.); t23087@fzu.edu.cn (L.S.); yfanym@fzu.edu.cn (Y.L.); yclv@fzu.edu.cn (Y.L.); yexiaoxia@fzu.edu.cn (X.Y.)

<sup>2</sup> Jiangsu Co-Innovation Center of Efficient Processing and Utilization of Forest Resources, Nanjing Forestry University, Nanjing 210037, China; hybian1992@njfu.edu.cn

\* Correspondence: lcx2010@fzu.edu.cn (C.L.); lixiaojuan@fzu.edu.cn (X.L.); Tel.: +86-0591-2286-6072 (C.L.)

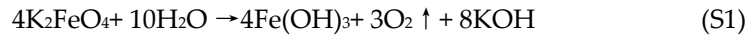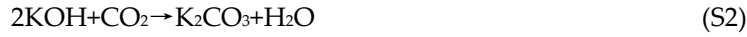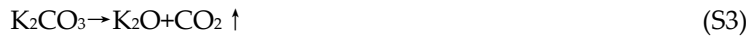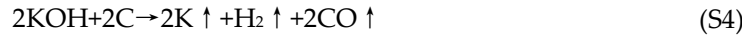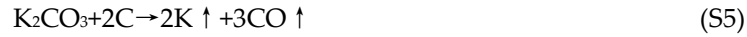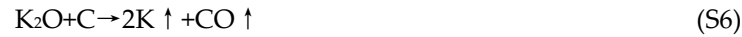

$$\ln \frac{C_0}{C_t} = K_{\text{obs}} t \quad (\text{S7})$$

where  $C_0$  and  $C_t$  (mg/L) represent for the concentrations of GL at initial and  $t$  (min) time, respectively.

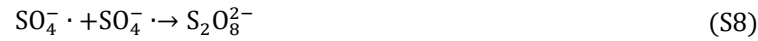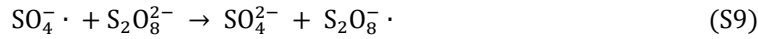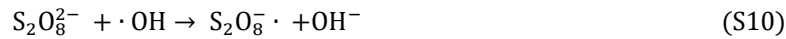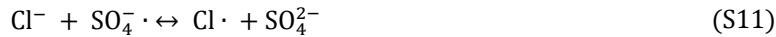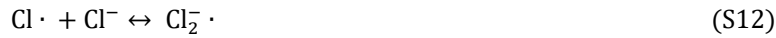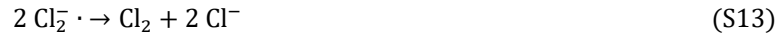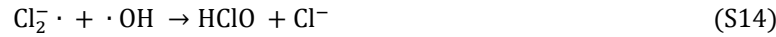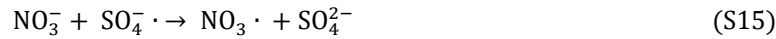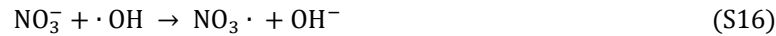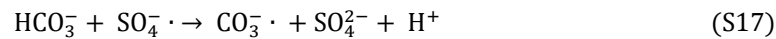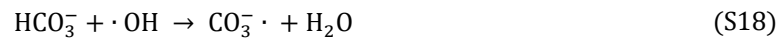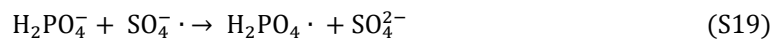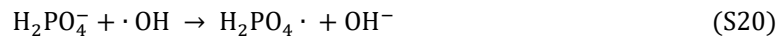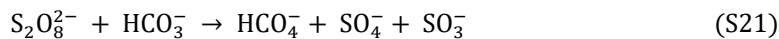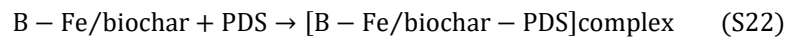

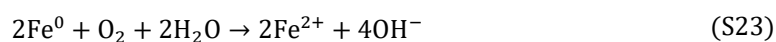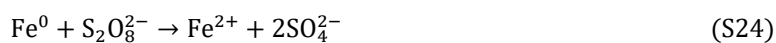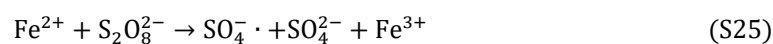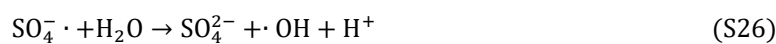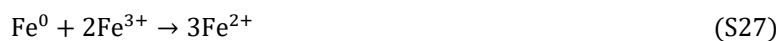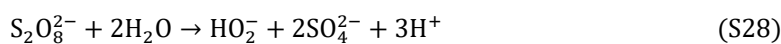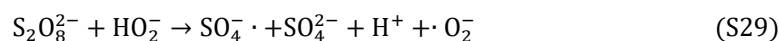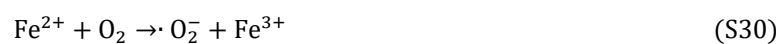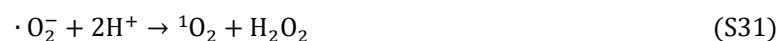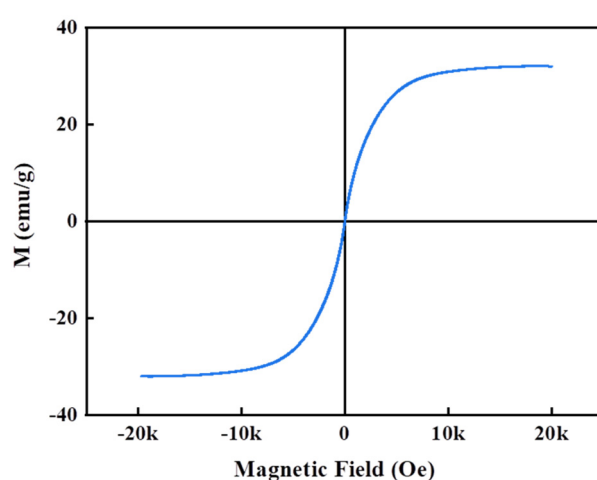

**Fig. S1** Magnetic hysteresis of B-Fe/biochar

**Table S1.** BET surface area, pore distribution and total pore volume of catalysts.

| Catalyst types   | Specific surface area ( $\text{m}^2 \text{g}^{-1}$ ) | Adsorption average pore width (nm) | Pore volume ( $\text{cm}^3 \text{g}^{-1}$ ) |
|------------------|------------------------------------------------------|------------------------------------|---------------------------------------------|
| Pristine biochar | 460.97                                               | 2.21                               | 0.25                                        |
| Fe/biochar       | 473.14                                               | 2.83                               | 0.33                                        |
| B-Fe/biochar     | 538.74                                               | 2.39                               | 0.32                                        |

**Table S2** Comparison of activation energy of different catalysts for degrading organic

| Catalyst                             | Target pollutant               | Activation energy (KJ/mol) | Reference           |
|--------------------------------------|--------------------------------|----------------------------|---------------------|
| B-KBC                                | sulfamethoxazole               | 63.75                      | Liu et al, 2020     |
| Fe <sub>2</sub> O <sub>3</sub> @LBC  | cephalexin                     | 38.76                      | Song et al, 2021    |
| MnFe <sub>2</sub> O <sub>4</sub> /BC | malachite green                | 84.41                      | Chen et al, 2023    |
| nZVI@BC                              | atrazine                       | 83.34                      | Zhang et al, 2021   |
| CBC-1                                | 2,4-dichlorophenoxyacetic acid | 43.73                      | Liang et al, 2021   |
| NCS-6                                | bisphenol A                    | 34.1                       | Xie et al, 2020     |
| nZVI/BC3                             | nonylphenol                    | 43.45                      | Hussain et al, 2017 |
| B-Fe/biochar                         | guaiacol                       | 32.85                      | This work           |
